# Supplementary material for: The Gossypium hirsutum TIR‐NBS‐LRR gene GhDSC1 mediates resistance against Verticillium wilt
Source: PubMed Central journal article supplement (PMC6637886; doi:10.1111/mpp.12797), 2019-04-08
Supplement: MPP-20-857-s001.pdf [file MPP-20-857-s001.pdf]

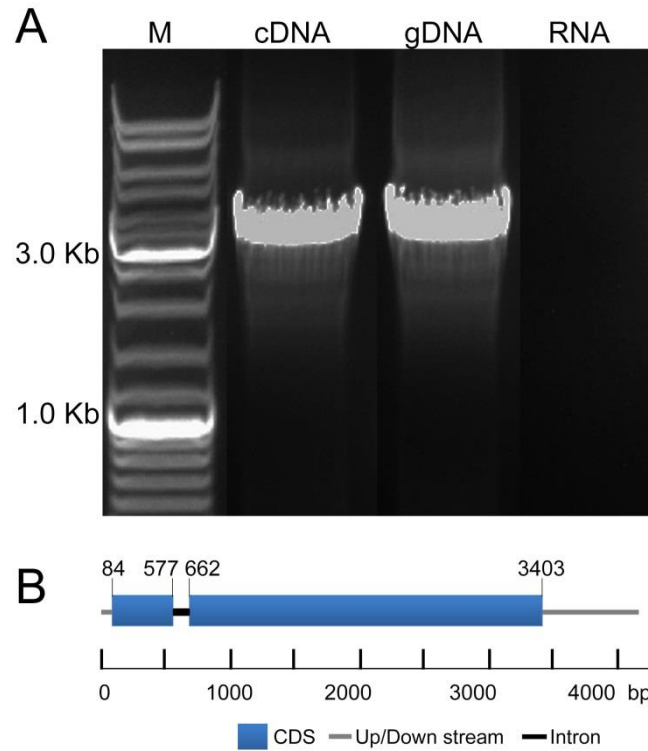

**Figure S1 | Cloning of *GhDSC1* from *Gossypium hirsutum*.** (A) Amplification of *GhDSC1* by reverse transcription-PCR. RNA was isolated from cotton roots of *G. hirsutum* cv. Zhongzhimian No. 2 24 h after inoculation with *V. dahliae* Vd991. After RNA isolation and cDNA synthesis, *GhDSC1* was amplified by RT-PCR using the cDNA template (cDNA lane). DNA contamination in the RNA sample was assayed by PCR (RNA lane). The *GhDSC1* structure was determined by amplification using the genomic DNA (DNA lane). (B) The exon and intron boundaries of *GhDSC1* were obtained by comparison the cDNA sequence to the genome sequence of the *Gossypium hirsutum*.
