# Supplementary material for: The Gossypium hirsutum TIR‐NBS‐LRR gene GhDSC1 mediates resistance against Verticillium wilt
Source: PubMed Central journal article supplement (PMC6637886; doi:10.1111/mpp.12797), 2019-04-08
Supplement: MPP-20-857-s002.pdf [file MPP-20-857-s002.pdf]

|                                                                                                                               |                                                                                                          |      |
|-------------------------------------------------------------------------------------------------------------------------------|----------------------------------------------------------------------------------------------------------|------|
| AiDSC1                                                                                                                        | ...MESSSSPSSAEFVFLSFRGSDTRNNFTGHLQKALLGLDSEFDRLRGGDNL...AFDRITKSKLITIVSTNYANSAICLRELVVLEPCRN..           | 92   |
| NgN                                                                                                                           | ...MASSSSSRWSYVFLSFRGSDTRKTFTHLYEVLVNDGIRFODDKPIYGATIPGEGCKLIESOFIVVTSENVASVCIENLIMCKPT..                | 95   |
| GhDSC1                                                                                                                        | MASSSAPPFPQVKHQVFLSFRGSDTRNNFTSHLLKALLLTGLVVFDEEELFGEKLDLISQ...AASNLSLLVLSKDYAS...SCLGELSDMDRRKP         | 100  |
| <b>TIR</b>                                                                                                                    |                                                                                                          |      |
| AiDSC1                                                                                                                        | <u>SNQOLVPIFYKDKSDPEKRNSTFVPEKLPDLTTEGVTPEISSWKAASASNILEVMVK..EISTSEPKIMDITAVDTFKLIDAPSGNPELVLGI</u>     | 190  |
| NgN                                                                                                                           | <u>DFNCTIPIPIYDVSISVWVNOKSFKABEHEKDKD.DVEGQWRALNEAALGSCDN...RMTDQDCTIIDQISSKLCCKLSLVLQIVGI</u>           | 191  |
| GhDSC1                                                                                                                        | <u>EDRHALLPIFYHVSISVWVIGTERTSSEHEKRE...LDVWKWKAFTEVGTGWHEGGKFDNTEYIDVVEYLKRLSNCRSVSEDLVGI</u>            | 197  |
| <b>TIR</b>                                                                                                                    |                                                                                                          |      |
| AiDSC1                                                                                                                        | <u>EQRNLEKLLSWEDDITVHIIGIVGMVGIGKTTLADCLYGRMC.....OFDGSIFINIRENSGFSGLISLQKLESITVINDRDIIEGAGG/AHERI</u>   | 284  |
| NgN                                                                                                                           | <u>DFHEKIEISLLEFG...INGNMIGMVGKTTIARAFDITLDRMSSYDFCAFLDIKEN...RRGHSIQALIKELLREKANYNEE.DCKHQM</u>         | 287  |
| GhDSC1                                                                                                                        | <u>EDQK...IILGIEQADSIVILGMGIGKTTLAIIVYKEVSP.....EEESRFFLNWSKKIKDQDLSLNDLTKLKEKECVTTSIYV</u>              | 287  |
| <b>P-loop</b> <span style="margin-left: 150px;"><b>RNBS-A</b></span>                                                          |                                                                                                          |      |
| AiDSC1                                                                                                                        | <u>ERRLKSKLLLVLDLVNPEK...IRVIMHCKYQGSRIITTRDSKLEET.IKGRKIVLPINLDRALKLFLSNANSNFPLKFFGLNMLIYAGH</u>        | 382  |
| NgN                                                                                                                           | <u>ASRLRSKVLIVLDDIINKHYEYLA...DFNGSRIIITTRDHLIEK...NIIIVYVITALPHESTALEKQHARGKEVENEFFKLSLEVMVYAGL</u>     | 385  |
| GhDSC1                                                                                                                        | <u>NERLNKSVLLVLDLISDDQ...DFMG...VTHEFGSKIIVTSRDIQINNGGAKTHVVKLLANDSLLESTFAKQLNBAVFRDLRKEVRYAQSS</u>      | 384  |
| <b>Kinase-2</b> <span style="margin-left: 100px;"><b>RNBS-B</b></span> <span style="margin-left: 100px;"><b>RNBS-C</b></span> |                                                                                                          |      |
| AiDSC1                                                                                                                        | <u>PLALKVLSGSLDCEPDDLYWAKDLRKRSHGDYEVLLTSYEEITTEOKVFLDIAQFRRSENVVYVTSLLNSHG...DSSVVKDLVDRCLITLSDN.RI</u> | 481  |
| NgN                                                                                                                           | <u>PLALKVWGSIDHNRLRTWRKSAHEHMKNNSYSGIDDKLKIISYDLEPKQEMFLDIACFIRREEDVILILESCHICAEYGLRLLIDKSLVFISEVNI</u>  | 485  |
| GhDSC1                                                                                                                        | <u>PLALKVGSLLYKSRKWESEVDRLECAQPKLQQLSSFNLDDEIKNIFLDLAIETKRESENVVEILNICYKVDGIRSLDKLDLTKSISEI</u>          | 484  |
| <b>RNBS-D</b>                                                                                                                 |                                                                                                          |      |
| AiDSC1                                                                                                                        | <u>EMHDMLOVAREISLKVETIGIRDCRWLSRHGNQCWHIRLWSELICDLLIEGLTIRKRGILDSSKLRAIRLSAKAFGMYLKM...KLYDSHCRCG</u>    | 581  |
| NgN                                                                                                                           | <u>EMHDIQDMKYLIN.....FQDDEGRRLWLAKVEVVMENITGMAEATVSS.YESTREFSNQAKMKRRLVFNMGRS.....</u>                   | 583  |
| GhDSC1                                                                                                                        | <u>SMHDMLEMERDITVR.....QESRPEQQRWLWPKIVDQVLYKIKGTLTRGIRKVCMSPIDVRRINPTALQNMHLRRTYFSITRWVGG..</u>         | 568  |
| <b>MHD</b>                                                                                                                    |                                                                                                          |      |
| AiDSC1                                                                                                                        | <u>EAEIKLHLRRGLSFLPNLITYHHCYPLSHELIFPRKLVLDLLEPHSQLLEIHWDEKDYGLMKWVDSLHINIRQCLGLAIAHNLRLNLEGCNSL</u>     | 681  |
| NgN                                                                                                                           | <u>.....STHYADYLEPNLRGFCVCTNYPPSESTBELMLVHQLRNSLRHLEWTRKHLPSLRRIDLWKRTRTPDFTGPNLLYVNLVQCINLEE</u>        | 657  |
| GhDSC1                                                                                                                        | <u>..GAYLDQVDDIAYLENLRLGICNDGYFRKLSNSYNENLVLELNGNVNRLWEDD.....HDDVNLRHLDLISYKKR</u>                      | 645  |
| AiDSC1                                                                                                                        | <u>LESINCLELILYINRIRCTLSLEKGIKTOSLITLILSICSSLKKEPLLS...ENVELLIDETVTLSTFESTQTRRALALIKKCKKIKHLSL</u>       | 777  |
| NgN                                                                                                                           | <u>VHHSFGCSVWGHYNCKELRFFWN...TESLIYIGLRSQDLELPELYGRMKPEIQRMQSSIRELSSIQWTHYTKLMLMANNVALPSSH</u>           | 756  |
| GhDSC1                                                                                                                        | <u>ENLNRALNLRKTKVCSQDNLVEPELDHIESLDELEFECCNLMEKWP...NIFSLDELSTLEVEVDSIGYLD.MLECDLIS.HSYVQSVSH</u>        | 739  |
| <b>LRRs</b>                                                                                                                   |                                                                                                          |      |
| AiDSC1                                                                                                                        | <u>YKLLKIQBLILSFCSCQLVPEPIKEQMBSELELLMDISSTEMKMHLSNKTFSICGTSSHVS...SMFEMPTLCSRRTDLYSRQSY...LADITE</u>    | 875  |
| NgN                                                                                                                           | <u>CRIKSFVSTSYSCSRLSLEPPEIGDLNIRVFDASDILLRPSSIRLAKLILMFRGFKDG...HFEPEVAEGHSWEYLNLSYCNIDGGLEETE</u>       | 855  |
| GhDSC1                                                                                                                        | <u>LKLNLDLDSLSYSPKFPETPKNLISN.....LSCGKNEVSLSSNP.....LSNRRELNGSSIQ...LQCLIA</u>                          | 806  |
| <b>LRRs</b>                                                                                                                   |                                                                                                          |      |
| AiDSC1                                                                                                                        | <u>GLSSIQSICISGNNIENPEFNOINNKWFLEFKMKRSLEVLPONQOYLDHESELLETIAN.....PITPTVGERIHSMFIFSNCYKIQDAQA</u>       | 969  |
| NgN                                                                                                                           | <u>SLSSIKKDLSSRNPEHPPSAAGALQSLDLDQQRPTOLPELPEENLHVYCHALKETHLVTKRKKLHRKIDIAHNDIYVNLFAVMEQNISS</u>         | 955  |
| GhDSC1                                                                                                                        | <u>.....LFCSEETTGGAPEFLRFRKSLGCTVHEHNSKLLSELPEYVMDLANYLCLSEVVS...SAQHQDLYELHSEFNFCMLFSNCEFLVQSDID</u>    | 899  |
| AiDSC1                                                                                                                        | <u>SIVGHRIRKQLANASAKRYRGFPEPVGICYATIPSP...FCHQRLGRSLETFLPPHGDIN...FVGLRSLVVSFKDYEDAKRSVRCGNGFENK</u>     | 1067 |
| NgN                                                                                                                           | <u>MRHDISASDLSLSTVFGQPP.....EKIPS...FHHQWGDSSVGNLENKYIPDFLFLFAVQYSR...SLIDITAHLPVGDDEKMSRM</u>           | 1036 |
| GhDSC1                                                                                                                        | <u>NIAANMLKIRFLKCKWVSYH...LRRPFYSYEGNIPSNKREHQSNESSLKRTANCSGSRFLVSEICLVADLTELDCSEFCECQLTAASG</u>         | 996  |
| AiDSC1                                                                                                                        | <u>DSSFT...DFTLAEMPEGCSISHESRKLTS...DHVFMGYNCSFLVNVHESNSCCPTKASFEFYVDDTRKKIETCEVIKCSMLMVPEPDDDCMLLKT</u> | 1167 |
| NgN                                                                                                                           | <u>TONLALSCEDTSSNYSEWDL.....HFFVPEPAFLDTSKANG...KTPNDYGIIRLSFSGEK.....MYGIRLLKKEGPE.....VN</u>           | 1108 |
| GhDSC1                                                                                                                        | <u>.AHEK...KSVQCKQMHSAVSGMG...DHLLIFGDMVKDEG.....VQASFEFYKYLGE.....</u>                                  | 1052 |
| AiDSC1                                                                                                                        | <u>NIVQSLKGPSY...DDIMDDVREFRGLCFVGEPEPGKRRKEEKITVR.....</u>                                              | 1219 |
| NgN                                                                                                                           | <u>ALLQRENSEPTHESTGIIRTYNNRSTFYELN.....</u>                                                              | 1144 |
| GhDSC1                                                                                                                        | <u>.....ENMKVKGCVVSYVDEPREQSTT.....</u>                                                                  | 1077 |

**Figure S2 | Structure-based multiple sequence alignment of the subdomains in *GhDSC1* to known TIR-NBS-LRR proteins.** The secondary structure assignments of the known TIR-NBS-LRR proteins are underlined. Conserved residues are marked by asterisks. *N. glutinosa* *NgN* (Genebank ID: AAA50763.1), and *A. thaliana* *AtRPP5* (Genebank ID: AAF08790.1).
