# Supplementary material for: The Gossypium hirsutum TIR‐NBS‐LRR gene GhDSC1 mediates resistance against Verticillium wilt
Source: PubMed Central journal article supplement (PMC6637886; doi:10.1111/mpp.12797), 2019-04-08
Supplement: MPP-20-857-s003.pdf [file MPP-20-857-s003.pdf]

| Predicted NLSs in query sequence                   |                                                    |                  |
|----------------------------------------------------|----------------------------------------------------|------------------|
|                                                    | <b>NLS1</b>                                        |                  |
| MASSAPPPP                                          | <b>PQVKHQVFLSFRGEDTRNNFTSHLLKALKDT</b>             | 50               |
| KLEKGEKLSDALSQAI                                   | AASNLSILVLSKDYASSKSCLGELSDIMDRKRKP                 | 100              |
| TDKHI                                              | ALPIFYHVDPSHVRNIGETFKTSFEEHESKRPVDEVKRWKVAFTE      | 150              |
| VGTLKGWHIEGGKFDR                                   | SETEYIKDVVEYVLKKLNSNCRSVSEDLVGIDDQ                 | 200              |
| KRIILGLIEQADSRVIGLWGMGGIGKTTLADIVYKEVSP            | EFESRFFLRNV                                        | 250              |
| SKKIKDQGD                                          | ESLRNDLLSKLLKEKEICVDTPSIGYPYNERLNNKSVLLVL          | 300              |
| DDISDPDQIDFMGVTHFGPGSKIIVTSRDRQILNNGGADKIHEVKKLNAN |                                                    | 350              |
| DSLQLFSTFAFKQLNPAVDFRDLSRKFVKYAQGSPLALKVCGSTLYKKS  | R                                                  | 400              |
| KEWESEVDKLR                                        | CAQPKILQILESSFNGLDEIEKNIFLDIAIFFKGERRE             | 450              |
| NVEEILNCCYKGV                                      | DGVIRSLLDKSLLDTKSYSEISMHDMLEEMGRDIVRQ              | 500              |
| ESRRPQE                                            | QSRWLWPKDQVQLKYNKGTDLTKGKVCMSPTDVRRI               | 550              |
| QNMHNLRFIYFSLTKWVGGYAYDQVDDIAYLPNELRCLCWD          | CYPFKSLSS                                          | 600              |
| NYNPENLVILRLRGSNVEQLWDEDKHQDLVNLRHIDISYCKLRKIPNLL  |                                                    | 650              |
| RAINLKTVICSWCDNLVEIPCLDHLESLELEFEGCCNLKMF          | PKVPNIFS                                           | 700              |
| VLDLSNTGIEEVPDSIGYLDMLECLDLSHSHKVS                 | SVSSNLIKLNDDDL                                     | 750              |
| YSMI                                               | TKFPETPKNLTSNLSGTKINEVSLSSNPLSNLRELDMGFSSIQK       | 800              |
| LQCNI                                              | ALFCSGETTGGAPSPILRFKSLGCLTVHECNLSLKLSELPPYLWQ      | 850              |
| LDANYCLSLEEVS                                      | FSAHQDLYELHSSFDNFDCFMLFSNCFSLNQDSIDN               | 900              |
| IAANAM                                             | LKIRFLAKKWSKYHLRPRVFYSYFPGNEIPSNKFEHQSNHSSL        | 950              |
| TLKI                                               | APNGCSGRFLVFSICLVADLTELLDCSEFICECQLTAASGARHE       | 1000             |
| KFKSVWQ                                            | GKQYHSASMGMGDHVLILFGG <b>DMVKKDEGYEQASFEFYLKYL</b> | 1050             |
| <b>GEENMKVKKC</b>                                  | GVDVSYVDEEPPKQSTT                                  | <b>NLS2</b> 1077 |

  

| Predicted bipartite NLS |                                        |       |
|-------------------------|----------------------------------------|-------|
| Pos.                    | Sequence                               | Score |
| 11                      | <b>PQVKHQVFLSFRGEDTRNNFTSHLLKALKDT</b> | 6.9   |
| 1030                    | <b>DMVKKDEGYEQASFEFYLKYLGEENMKVKKC</b> | 5.7   |

**Figure S3 | Prediction of nuclear localization signals in *GhDSCI*.** Nuclear localization signals prediction of *GhDSCI* was conducted using the web-based program cNLS mapper ([http://nls-mapper.iab.keio.ac.jp/cgi-bin/NLS\\_Mapper\\_form.cgi](http://nls-mapper.iab.keio.ac.jp/cgi-bin/NLS_Mapper_form.cgi)). Peptide sequences in red color represent two nuclear localization signals (NLS1 and NLS2) in *GhDSCI*.
