# Supplementary material for: The Gossypium hirsutum TIR‐NBS‐LRR gene GhDSC1 mediates resistance against Verticillium wilt
Source: PubMed Central journal article supplement (PMC6637886; doi:10.1111/mpp.12797), 2019-04-08
Supplement: MPP-20-857-s004.pdf [file MPP-20-857-s004.pdf]

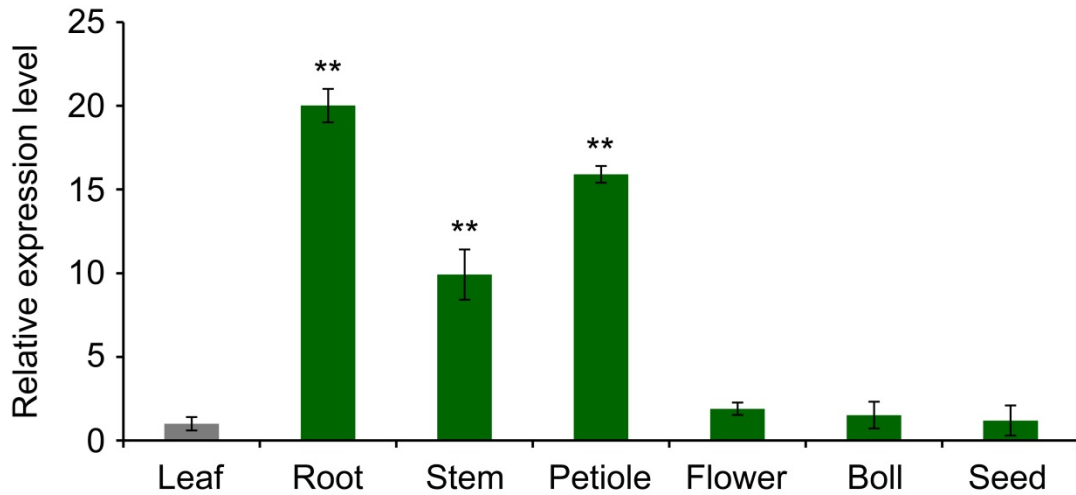

**Figure S4 | Expression analysis of *GhDSC1* in different cotton tissues.** The adult-plant stage of cotton plants (cv. Zhongzhimian No.2) were irrigated with a suspension of  $5 \times 10^6$  conidia/mL of *V. dahliae* strain Vd991. Different tissue samples (leaf, Root, Stem, Petiole, Flower, Boll and Seed) were collected 72 hours after inoculation for RNA isolation and cDNA synthesis. Relative expression analysis of *GhDSC1* was performed by reverse transcription-quantitative PCR using the cotton *18S* gene as a reference. Values represent the averages of three independent biological replicates of three plants each. Error bars represent standard errors. Asterisks (\*\*) represent statistical significance of  $P < 0.01$ , respectively, according to an unpaired Student's *t*-tests of each of the leaf samples used as a control.
