# Supplementary material for: The Gossypium hirsutum TIR‐NBS‐LRR gene GhDSC1 mediates resistance against Verticillium wilt
Source: PubMed Central journal article supplement (PMC6637886; doi:10.1111/mpp.12797), 2019-04-08
Supplement: MPP-20-857-s005.pdf [file MPP-20-857-s005.pdf]

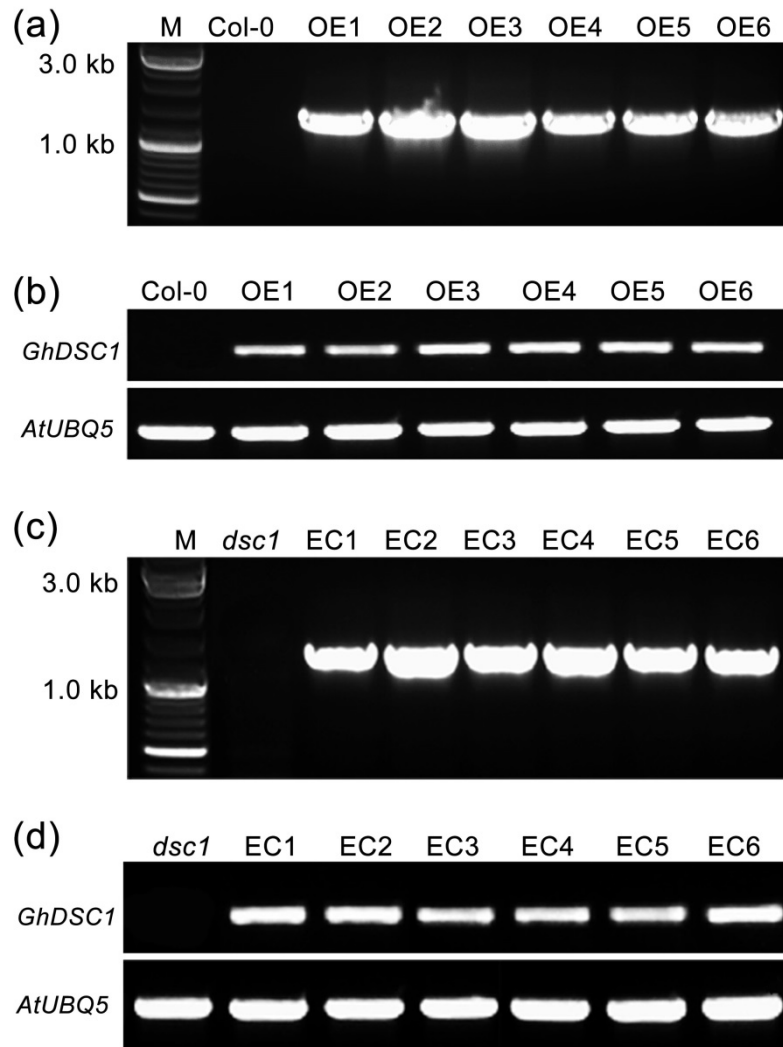

**Figure S5 | Validation of positive transformants of *GhDSC1* transgenic *Arabidopsis thaliana* lines.** (A) and (C) PCR products targeting a fragment of *GhDSC1* amplified from DNA extracted from *GhDSC1*-overexpressing transgenic lines of *A. thaliana* ecotype Col-0 (OE) and *A. thaliana dsc1* mutant introduction of *GhDSC1* (EC). (B) and (D) Reverse transcription-PCR amplification of *GhDSC1* cDNA in the same transgenic *A. thaliana*. *UBQ5* is shown as a control.
