# Supplementary material for: The Gossypium hirsutum TIR‐NBS‐LRR gene GhDSC1 mediates resistance against Verticillium wilt
Source: PubMed Central journal article supplement (PMC6637886; doi:10.1111/mpp.12797), 2019-04-08
Supplement: MPP-20-857-s006.pdf [file MPP-20-857-s006.pdf]

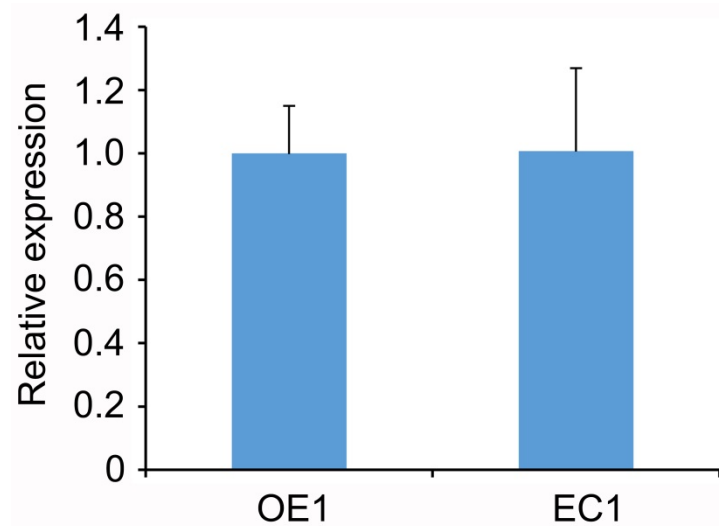

**Figure S6 | Quantification of *GhDSC1* expression in the transgenic line overexpressing *GhDSC1* and the *GhDSC1*-recipient *dsc1* mutant.** The transcript levels of *GhDSC1* was detected in three-week-old plants that growth in Murashige-Skoog medium. Relative expression analyses of *GhDSC1* using reverse transcription-quantitative PCR (RT-qPCR) was performed using the comparative threshold  $2^{-\Delta\Delta CT}$  method, and relative expression was compared with expression levels in the transgenic lines overexpressing *GhDSC1* compared to the *GhDSC1*-recipient *dsc1* mutant. Values represent averages of three independent biological replicates of three plants each. Error bars were calculated based on three biological replicates using standard deviation.
