# Supplementary material for: The Gossypium hirsutum TIR‐NBS‐LRR gene GhDSC1 mediates resistance against Verticillium wilt
Source: PubMed Central journal article supplement (PMC6637886; doi:10.1111/mpp.12797), 2019-04-08
Supplement: MPP-20-857-s008.pdf [file MPP-20-857-s008.pdf]

| Phenotype   | Germplasm       | Positions |   |   |   |   |   |   |   |   |   |   |
|-------------|-----------------|-----------|---|---|---|---|---|---|---|---|---|---|
|             |                 | 7         | 6 | 9 | 3 | 4 | 2 | 8 | 9 | 0 | 1 | 9 |
| Resistance  | Zhongzhimian 2  | A         | C | T | G | A | A | T | G | C | T | T |
|             | Kelin 15-416    | A         | C | T | G | A | T | T | G | C | T | G |
|             | Emian 23        | A         | C | T | G | A | T | T | G | C | T | A |
|             | 20040701        | T         | G | T | G | A | A | T | G | C | T | T |
|             | Jimian 616      | A         | C | A | C | T | A | T | G | C | T | A |
|             | Zhongmiansuo 60 | A         | C | T | G | A | A | T | G | C | T | A |
|             | Yangpin 2       | A         | C | T | G | A | A | - | - | - | T | T |
|             | TZ06            | A         | C | T | G | A | A | T | G | C | T | A |
|             | Chuangmian36    | A         | C | T | G | A | A | T | G | C | T | T |
|             | Susceptible     | Jimian 11 | A | G | T | C | A | T | T | G | C | T |
| Liaomian 30 |                 | A         | G | A | C | T | A | T | G | C | T | C |
| XZ-14       |                 | A         | G | A | C | T | T | T | G | C | T | T |
| Hui 30      |                 | A         | C | A | C | T | A | T | G | C | T | A |
| Han8944     |                 | A         | C | A | C | T | A | T | - | - | - | T |
| Xinluzao 39 |                 | A         | G | A | C | T | A | T | G | C | T | G |
| Junmian 1   |                 | A         | C | A | C | T | A | T | G | C | T | T |
| Jiumian 11  |                 | A         | C | A | C | T | T | T | G | C | T | T |
| Su22        |                 | T         | G | A | C | T | A | T | G | C | T | A |

**Figure S8 | Nucleotide sequence alignment of *GhDSC1* in *Gossypium hirsutum* resistant and susceptible germplasm accessions.** The alignment was performed by Clustal X2 with a GONNET 80 protein weight matrix. Only residues that deviate from the reference sequences are shown in the alignment; deletions are indicated by dashes (-). The polymorphism positions are written vertically, i.e. the first polymorphism occurs at position 177 of the CDS. The position in orange color (673 bp) represent the nonsynonymous mutation in *GhDSC1*.
