# Supplementary material for: The Gossypium hirsutum TIR‐NBS‐LRR gene GhDSC1 mediates resistance against Verticillium wilt
Source: PubMed Central journal article supplement (PMC6637886; doi:10.1111/mpp.12797), 2019-04-08
Supplement: MPP-20-857-s009.pdf [file MPP-20-857-s009.pdf]

| pGADT7 | pGBKT7    | SD/-LWHA                                                                           |  |  |  |
|--------|-----------|------------------------------------------------------------------------------------|--|--|--|
| p53    | T-antigen | 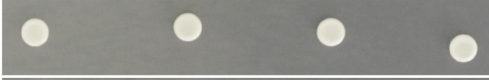 |  |  |  |
| GhDSC1 | lam       |  |  |  |  |
| GhDSC1 | GhCAMT3   |  |  |  |  |

**Figure S9 | Yeast two-hybrid assay of *GhDSC1* and *GhCAMTA3* proteins.**

SD/-LWHA represents the selection medium lacking Leu, Trp, His, and Ade. The interaction of murine p53 (p53) and SV40 large T-antigen (T) was used as a positive control for the system, and human lamin C (lam) was used in the negative interaction control.
