# Supplementary material for: The Gossypium hirsutum TIR‐NBS‐LRR gene GhDSC1 mediates resistance against Verticillium wilt
Source: PubMed Central journal article supplement (PMC6637886; doi:10.1111/mpp.12797), 2019-04-08
Supplement: MPP-20-857-s010.pdf [file MPP-20-857-s010.pdf]

**Table S1 Information of cotton varieties used in this study**

| <b>Species</b>            | <b>Genotype</b> | <b>Code ID</b> | <b>Name in this study</b> | <b>Origin</b>   |
|---------------------------|-----------------|----------------|---------------------------|-----------------|
| <i>Gossypium hirsutum</i> | Resistance      | A240           | Zhongzhimian 2            | Beijing, China  |
| <i>Gossypium hirsutum</i> | Resistance      | A238           | Kelin 15-416              | Henan, China    |
| <i>Gossypium hirsutum</i> | Resistance      | A013           | Emian 23                  | Hubei, China    |
| <i>Gossypium hirsutum</i> | Resistance      | A180           | 20040701                  | Hubei, China    |
| <i>Gossypium hirsutum</i> | Resistance      | A222           | Jimian 616                | Hebei, China    |
| <i>Gossypium hirsutum</i> | Resistance      | A277           | Zhongmiansuo 60           | Henan, China    |
| <i>Gossypium hirsutum</i> | Resistance      | A233           | Yangpin 2                 | Hebei, China    |
| <i>Gossypium hirsutum</i> | Resistance      | A081           | TZ06                      | Hubei, China    |
| <i>Gossypium hirsutum</i> | Resistance      | A095           | Chuanmian 36              | Sichuan, China  |
| <i>Gossypium hirsutum</i> | Susceptible     | A290           | Jimian 11                 | Hebei, China    |
| <i>Gossypium hirsutum</i> | Susceptible     | A103           | Liaomian 30               | Liaoning, China |
| <i>Gossypium hirsutum</i> | Susceptible     | A025           | XZ-14                     | Hunan, China    |
| <i>Gossypium hirsutum</i> | Susceptible     | A076           | Hui 30                    | Hubei, China    |
| <i>Gossypium hirsutum</i> | Susceptible     | A095           | chuanmian 36              | Hebei, China    |
| <i>Gossypium hirsutum</i> | Susceptible     | A203           | Xinluzao 39               | Xinjiang, China |
| <i>Gossypium hirsutum</i> | Susceptible     | A293           | Junmian 1                 | Xinjiang, China |
| <i>Gossypium hirsutum</i> | Susceptible     | A141           | Jiumian 11                | Gansu, China    |
| <i>Gossypium hirsutum</i> | Susceptible     | A010           | Su22                      | Jiangsu, China  |
