# Supplementary material for: The Gossypium hirsutum TIR‐NBS‐LRR gene GhDSC1 mediates resistance against Verticillium wilt
Source: PubMed Central journal article supplement (PMC6637886; doi:10.1111/mpp.12797), 2019-04-08
Supplement: MPP-20-857-s011.pdf [file MPP-20-857-s011.pdf]

**Table S2 Primers used in this study**

| <b>Primer name</b>                                                                         | <b>Primer sequence (5' -3' )</b>                      | <b>Purpose</b>                                          |
|--------------------------------------------------------------------------------------------|-------------------------------------------------------|---------------------------------------------------------|
| <b>Full length DNA and cDNA amplify</b>                                                    |                                                       |                                                         |
| GhDSC1-F-F                                                                                 | AATGAAATGAAACCCAC                                     | Primers for full length amplify of <i>GhDSC1</i>        |
| GhDSC1-F-R                                                                                 | AAATCAAAGTTCCTCA                                      | Primers for full length amplify of <i>GhDSC1</i>        |
| <b>Gene expression pattern analysis</b>                                                    |                                                       |                                                         |
| GhDSC1-Q-F                                                                                 | TCCTCCTCCTCCTCAAGT                                    | RT-qPCR for <i>GhDSC1</i> gene                          |
| GhDSC1-Q-R                                                                                 | TGCGATCCATAATGTCAGAA                                  | RT-qPCR for <i>GhDSC1</i> gene                          |
| GhCAMTA3-Q-F                                                                               | TTCTTCGTTGCCACACTC                                    | RT-qPCR for <i>GhCAMTA3</i> gene                        |
| GhCAMTA3-Q-R                                                                               | ACTCTCGGACTTCACTACA                                   | RT-qPCR for <i>GhCAMTA3</i> gene                        |
| CAMTA3-Q-F                                                                                 | GCAAGACGGAACAGAGAA                                    | RT-qPCR for CAMTA3 gene                                 |
| CAMTA3-Q-R                                                                                 | AGGACATAGGCAACATCAAT                                  | RT-qPCR for CAMTA3 gene                                 |
| <b>Primers for transgenic lines detection</b>                                              |                                                       |                                                         |
| GhDSC1-T-F                                                                                 | TCCTCCTCCTCCTCAAGT                                    | Primers for <i>GhDSC1</i> transgenic lines detecting    |
| GhDSC1-T-R                                                                                 | CTCCTTATTACACCATCTACAC                                | Primers for <i>GhDSC1</i> transgenic lines detecting    |
| <b>Primers for fungal biomass detection</b>                                                |                                                       |                                                         |
| VdEF-1 $\alpha$ -F                                                                         | TGAGTTCGAGGCTGGTATCT                                  | For qPCR measurement of <i>V. dahliae</i> level         |
| VdEF-1 $\alpha$ -R                                                                         | CACTTGGTGGTGTCCATCTT                                  | For qPCR measurement of <i>V. dahliae</i> level         |
| Gh18S-F                                                                                    | CGGCTACCACATCCAAGGAA                                  | Endogenous control for qPCR in <i>G. hirsutum</i>       |
| Gh18S-R                                                                                    | TGTCACTACCTCCCCGTGTCA                                 | Endogenous control for qPCR in <i>G. hirsutum</i>       |
| <b>Expression detection of marker genes related to JA pathway in <i>A. thaliana</i></b>    |                                                       |                                                         |
| AtPDF1.2-Q-F                                                                               | CTTGTTCTCTTTGCTGCTTTC                                 | RT-qPCR for <i>AtPDF1.2</i> gene                        |
| AtPDF1.2-Q-R                                                                               | CATGTTTGGCTCCTTCAAG                                   | RT-qPCR for <i>AtPDF1.2</i> gene                        |
| AtVSP2-Q-F                                                                                 | TCATACTCAGTGACCGTTGG                                  | RT-qPCR for <i>AtVSP2</i> gene                          |
| AtVSP2-Q-R                                                                                 | TGTACACCACTTGCCTCAAG                                  | RT-qPCR for <i>AtVSP2</i> gene                          |
| AtPR3-Q-F                                                                                  | CGGCGACCTCCTTCTTCCTC                                  | RT-qPCR for <i>AtPR3</i> gene                           |
| AtPR3-Q-R                                                                                  | GAATGATGCCGCTTGTCTG                                   | RT-qPCR for <i>AtPR3</i> gene                           |
| AtPR4-Q-F                                                                                  | AATGGATCCACAATGCGGTCGTCART-qPCR for <i>AtPR4</i> gene |                                                         |
| AtPR4-Q-R                                                                                  | AATGAATTCTTCTGGAATAGGCTGRT-qPCR for <i>AtPR4</i> gene |                                                         |
| AtUBQ5-Q-F                                                                                 | GACGCTTCATCTCGTCC                                     | Endogenous control for RT-qPCR in <i>A. thaliana</i>    |
| AtUBQ5-Q-R                                                                                 | GTAAACGTAGGTGAGTCCA                                   | Endogenous control for RT-qPCR in <i>A. thaliana</i>    |
| <b>Expression detection of marker genes related to JA pathway in <i>N. benthamiana</i></b> |                                                       |                                                         |
| NbPDF1.2-Q-F                                                                               | ATCTGTCTGGGGAAATGGCA                                  | RT-qPCR for <i>NbPDF1.2</i> gene                        |
| NbPDF1.2-Q-R                                                                               | CATGGTCCCTTGAAACGGTG                                  | RT-qPCR for <i>NbPDF1.2</i> gene                        |
| NbVSP2-Q-F                                                                                 | TCATACTCAGTGACCGTTGG                                  | RT-qPCR for <i>NbVSP2</i> gene                          |
| NbVSP2-Q-R                                                                                 | TGTACACCACTTGCCTCAAG                                  | RT-qPCR for <i>NbVSP2</i> gene                          |
| NbPR3-Q-F                                                                                  | CACCAGGACTAACACCAAG                                   | RT-qPCR for <i>NbPR3</i> gene                           |
| NbPR3-Q-R                                                                                  | CTCTCCTACTCCTCTCTGC                                   | RT-qPCR for <i>NbPR3</i> gene                           |
| NbPR4-Q-F                                                                                  | TGGGTGGACATATTACAGAG                                  | RT-qPCR for <i>NbPR4</i> gene                           |
| NbPR4-Q-R                                                                                  | GGCACGCCGACACATTT                                     | RT-qPCR for <i>NbPR4</i> gene                           |
| NbActin-Q-F                                                                                | CGAGGGTTATGCTTGCCTC                                   | Endogenous control for RT-qPCR in <i>N. benthamiana</i> |
| NbActin-Q-R                                                                                | AGCAAGCTCCTCCTTCATGT                                  | Endogenous control for RT-qPCR in <i>N. benthamiana</i> |
